# 1    **Recurrent emergence and transmission of a SARS-CoV-2 Spike deletion H69/V70**

2

3    Kemp SA<sup>1,2,3\*</sup>, Harvey WT<sup>4\*</sup>, Lytras S<sup>5</sup>, The COVID-19 Genomics UK (COG-UK) consortium<sup>6</sup>,  
4    Carabelli AM<sup>3</sup>, Robertson DL<sup>5\*</sup>, Gupta RK<sup>2,3\*</sup>

5

6    <sup>1</sup>Division of Infection and Immunity, University College London, London, UK.

7    <sup>2</sup>Cambridge Institute of Therapeutic Immunology & Infectious Disease (CITIID), Cambridge,  
8    UK.

9    <sup>3</sup>Department of Medicine, University of Cambridge, Cambridge, UK.

10    <sup>4</sup>Institute of Biodiversity, Animal Health and Comparative Medicine, University of Glasgow,  
11    Glasgow, UK

12    <sup>5</sup>MRC - University of Glasgow Centre for Virus Research, Glasgow, UK.

13    <sup>6</sup><https://www.cogconsortium.uk>. Full list of consortium names and affiliations are in  
14    Appendix 1.

15

16

17    \*Authors contributed equally to this work

18

19

20    Address for correspondence:

21    Ravindra K. Gupta

22    Cambridge Institute for Therapeutic Immunology and Infectious Diseases

23    Jeffrey Cheah Biomedical Centre

24    Puddicombe Way

25    Cambridge CB2 0AW, UK

26    Tel: +44 1223 331491

27    [rkg20@cam.ac.uk](mailto:rkg20@cam.ac.uk)

28

29    Key words: SARS-CoV-2; COVID-19; antibody escape; neutralising antibodies; mutation;  
30    evasion; resistance; fitness; evolution

31

## 32 **Abstract**

33 SARS-CoV-2 Spike amino acid replacements in the receptor binding domain (RBD) occur  
 34 relatively frequently and some have a consequence for immune recognition. Here we report  
 35 recurrent emergence and significant onward transmission of a six-nucleotide deletion in the  
 36 S gene, which results in loss of two amino acids: H69 and V70. Of particular note this  
 37 deletion,  $\Delta$ H69/V70, often co-occurs with the receptor binding motif amino acid  
 38 replacements N501Y, N439K and Y453F. One of the  $\Delta$ H69/V70+ N501Y lineages, B.1.1.7, is  
 39 comprised of over 4000 SARS-CoV-2 genome sequences from the UK and includes eight  
 40 other S gene mutations: RBD (N501Y and A570D), S1 ( $\Delta$ H69/V70 and  $\Delta$ 144/145) and S2  
 41 (P681H, T716I, S982A and D1118H). Some of these mutations have presumably arisen as a  
 42 result of the virus evolving from immune selection pressure in infected individuals and at  
 43 least one, lineage B.1.1.7, potentially from a chronic infection. Given our recent evidence  
 44 that  $\Delta$ H69/V70 enhances viral infectivity (Kemp et al. 2020), its effect on virus fitness  
 45 appears to be independent to the RBD changes. Enhanced surveillance for the  $\Delta$ H69/V70  
 46 deletion with and without RBD mutations should be considered as a priority. Permissive  
 47 mutations such as  $\Delta$ H69/V70 have the potential to enhance the ability of SARS-CoV-2 to  
 48 generate new variants, including vaccine escape variants, that would have otherwise  
 49 significantly reduced viral infectivity.

50

## 51 **Background**

52 SARS-CoV-2's Spike surface glycoprotein engagement of hACE2 is essential for virus entry  
 53 and infection<sup>1</sup>, and the receptor is found in respiratory and gastrointestinal tracts<sup>2</sup>. Despite  
 54 this critical interaction and the constraints it imposes, it appears the RBD, and particularly  
 55 the receptor binding motif (RBM), is relatively tolerant to mutations<sup>3,4</sup>, raising the real  
 56 possibility of virus escape from vaccine-induced immunity and monoclonal antibody  
 57 treatments. Spike mutants exhibiting reduced susceptibility to monoclonal antibodies have  
 58 been identified in *in vitro* screens<sup>3,5,6</sup>, and some of these mutations have been found in  
 59 clinical isolates<sup>7</sup>. Due to the susceptibility of the human population to this virus, the acute  
 60 nature of infections and limited use of vaccines to date there has been limited selection  
 61 pressure placed SARS-CoV-2<sup>8</sup>; as a consequence few mutations that could alter antigenicity  
 62 have increased significantly in frequency.

63

64

65 The unprecedented scale of whole genome SARS-CoV-2 sequencing has enabled  
66 identification and epidemiological analysis of transmission and surveillance, particularly in  
67 the UK<sup>9</sup>. As of December 18<sup>th</sup>, there were 270,000 SARS-CoV-2 sequences available in the  
68 GISAID Initiative (<https://gisaid.org/>). However, geographic coverage is very uneven with  
69 some countries sequencing at higher rates than others. This could result in novel variants  
70 with altered biological or antigenic properties evolving and not being detected until they are  
71 already at high frequency.

72

73 Studying SARS-CoV-2 chronic infections can give insight into virus evolution that would  
74 require many chains of acute transmission to generate. This is because the majority of  
75 infections arise as a result of early transmission during pre or asymptomatic phases prior to  
76 peak adaptive responses, and virus adaptation not observed as the virus is usually cleared  
77 by the immune response<sup>10,11</sup>. We recently documented *de novo* emergence of antibody  
78 evasion mutations mediated by S gene mutations in an individual treated with convalescent  
79 plasma (CP)<sup>12</sup>. Dramatic changes in the prevalence of Spike variants  $\Delta$ H69/V70 (an out of  
80 frame six-nucleotide deletion) and D796H variant followed repeated use of CP, while *in vitro*  
81 the mutated  $\Delta$ H69/V70+D796H variant displayed reduced susceptibility to CP, at the same  
82 time retaining infectivity comparable to wild type<sup>12</sup>. The  $\Delta$ H69/V70 itself conferred a two-  
83 fold increase in Spike mediated infectivity using pseudotyped lentiviruses. Worryingly, other  
84 deletions in the N-Terminal Domain (NTD) have been reported to arise in chronic infections<sup>7</sup>  
85 and provide escape from NTD-specific neutralising antibodies<sup>13</sup>.

86

87 Here we analysed the available GISAID Initiative data for circulating SARS-CoV-2 Spike  
88 sequences containing  $\Delta$ H69/V70 and performed phylogenetic and structural modelling from  
89 the pandemic data and across sarbecoviruses in different species. We find, while occurring  
90 independently, the Spike  $\Delta$ H69/V70 often emerges after a significant RBM amino acid  
91 replacement that increases binding affinity to hACE2. Protein structure modelling indicates  
92 this mutation could also contribute to antibody evasion as suggested for other NTD  
93 deletions<sup>13</sup>.

94

95

96

## 97 **Results**

98 The deletion H69/V70 is present in over 6000 sequences worldwide, 2.5% of the available  
 99 data (Figure 1, Supplementary Figure 1), and largely in Europe from where most of the  
 100 sequences in GISAID are derived (Figure 1C-D). Many of the sequences are from the UK and  
 101 Denmark where sequencing rates are high compared to other countries.  $\Delta$ H69/V70 occurs  
 102 in variants observed in different global lineages, representing multiple independent  
 103 acquisitions of this SARS-CoV-2 deletion (Figure 1A). While variants with deletions in this  
 104 region of Spike are observed in GISAID<sup>13</sup>, the earliest unambiguous sequence that includes  
 105 the  $\Delta$ H69/V70 was detected in Sweden in April 2020, an independent deletion event  
 106 relative to other  $\Delta$ H69/V70 variants. The prevalence of  $\Delta$ H69/V70 has since increased since  
 107 August 2020 (Figure 1C-D). Further analysis of sequences revealed, firstly, that single  
 108 deletions of either 69 or 70 were uncommon and, secondly, some lineages of  $\Delta$ H69/V70  
 109 alone were present (Figure 1A), as well as  $\Delta$ H69/V70 in the context of other mutations in  
 110 Spike, specifically those in the RBM (Figure 1A, E, F).

111

112 To gauge the importance of this part of Spike molecule, we examined the 69/70 region of  
 113 Spike in a set of other known *Sarbecoviruses*, relatives to SARS-CoV-2 (Figure 2). We observe  
 114 substantial variability in the region, specifically caused by indels, with some viruses including  
 115 SARS-CoV having 6-7 amino acid deletions (Fig 2B). This is indicative of plasticity in this  
 116 protein region that could allow the sarbecoviruses to alter their Spike conformation. The  
 117 second closest relative to SARS-CoV-2 for this region after RaTG13 is the cluster of 5 CoVs  
 118 sampled in trafficked pangolins in the Guangxi province<sup>14</sup>. Looking at the 69/70 region in  
 119 these virus sequences raises the interesting observation that one of the five viruses in the  
 120 cluster, P1E, has amino acids 69H and 70L present, while the other four have a double  
 121 amino acid deletion (Figure 2B). Given that SARS-CoV-2 and RaTG13 have the homologous  
 122 HV insertion at these positions, the most parsimonious explanation is that the proximal  
 123 common ancestor between SARS-CoV-2 and the Guangxi pangolin cluster had the insertion,  
 124 which was then lost while circulating in the pangolin population, similar to what we now see  
 125 with SARS-CoV-2 in humans. Interestingly, the double amino acid deletion in the pangolin  
 126 viruses is in-frame in contrast to what is seen in SARS-CoV-2 (e.g. lineage B.1.1.7, Figure 2C).

127

To estimate the structural impact of  $\Delta$ H69/V70, the protein structure of the NTD possessing the double deletion was modelled. The  $\Delta$ H69/V70 deletion was predicted to alter the conformation of a protruding loop comprising residues 69 to 76, pulling it in towards the NTD (Figure 3A). In the post-deletion structural model, the positions of the alpha carbons of residues either side of the deleted residues, Ile68 and Ser71, were each predicted to occupy positions 2.9Å from the positions of His69 and Val70 in the pre-deletion structure. Concurrently, the positions of Ser71, Gly72, Thr73, Asn74 and Gly75 are predicted to have changed by 6.5Å, 6.7Å, 6.0Å, 6.2Å and 8Å, respectively, with the overall effect of these residues moving inwards, resulting in a less dramatically protruding loop. The position of this loop in the structure prior to the occurrence of the  $\Delta$ H69/V70 is shown in the context of the wider NTD in Figure 3B. The locations of main RBD mutations observed with  $\Delta$ H69/V70 are shown in Figure 3C and D. Residues belonging to a similarly exposed, nearby loop that form the epitope of a neutralising, NTD-binding epitope are also highlighted.

We next examined the lineages where S gene mutations in the RBD were identified at high frequency, in particular co-occurring with N439K (Figure 3C,D), an amino acid replacement reported to be defining variants increasing in numbers in Europe and other regions<sup>3</sup> (Figure 1E, Supplementary figure 2). N439K appears to have reduced susceptibility to a small subset of monoclonals targeting the RBD, whilst retaining affinity for ACE2 *in vitro*<sup>3</sup>. The proportion of viruses with  $\Delta$ H69/V70 only increased from August 2020 when it appeared with the second N439K lineage, B.1.141<sup>3</sup> (Figure 1E). As of November 26<sup>th</sup>, remarkably there were twice as many cumulative sequences with the deletion as compared to the single N439K indicating it may be contributing to the success of this lineage (Figure 1E). Due to their high sampling rates the country with the highest proportion of N439K+ $\Delta$ H69/V70 versus N439K alone is England. The low levels of sequencing in most countries indicate N439K's prevalence could be relatively high<sup>3</sup>. In Scotland, where early growth of N439K was high (forming N439K lineage B.1.258 that subsequently went extinct with other lineages after the lockdown<sup>3</sup>), there is now an inverse relationship with 546 versus 177 sequences for N439K and N439K+ $\Delta$ H69/ $\Delta$ V70 respectively (Figure 1E). These differences therefore likely reflect differing epidemic growth characteristics and timings of the introductions the N439K variants with or without the deletion.

The second significant cluster with  $\Delta$ H69/V70 and RBD mutants involves Y453F, another Spike RBD mutation that increases binding affinity to ACE2<sup>4</sup> (Figure 3C,D) and has been found to be associated with mink-human infections<sup>15</sup>. In one SARS-CoV-2 mink-human sub-lineage, termed 'Cluster 5', Y453F and  $\Delta$ H69/V70 occurred with F486L, N501T and M1229I and was shown to have reduced susceptibility to sera from recovered COVID-19 patients ([https://files.ssi.dk/Mink-cluster-5-short-report\\_AFO2](https://files.ssi.dk/Mink-cluster-5-short-report_AFO2)). Y453F has been described as an escape mutation for mAb REGN10933<sup>16</sup>. The  $\Delta$ H69/V70 was first detected in the Y453F background on August 24<sup>th</sup> and thus far appears limited to Danish sequences (Supplementary Figure 3).

A third lineage containing the same deletion  $\Delta$ H69/V70 has arisen with another RBD mutation N501Y (Figure 4A, C, Supplementary Figure 4). Based on its location it might be expected to escape antibodies similar to COV2-2499<sup>5</sup> (Figure 3C, D). In addition, when SARS-CoV-2 was passaged in mice for adaptation purposes for testing vaccine efficacy, N501Y emerged and increased pathogenicity<sup>17</sup>. Sequences with N501Y alone were isolated both in the UK, Brazil, and USA in April 2020, and recently in South Africa<sup>18</sup>. A newly described N501Y-derived lineage in South Africa, (B.1.351, Fig 1A) (also termed 501Y.V2) is characterised by eight mutations in the Spike protein, including N501Y and two other important residues in the receptor-binding domain (K417N and E484K) which are important residues in RBM<sup>18</sup>. The positions of residues 417, 484, and 501 proximal to the bound hACE2 are shown in Figure 4C. The E484K substitution has been identified as antigenically important being reported as an escape mutation for several monoclonal antibodies including C121, C144<sup>19</sup>, REGN10933 and REGN10934<sup>16</sup>. The increase in hACE2 binding affinity caused by N501Y may have been permissive for the mutation K417N. Specifically, the increased ACE2 affinity induced by N501Y (+0.24  $\Delta\log_{10} K_d$ ) will be compensated by K417N (-0.45  $\Delta\log_{10} K_d$ )<sup>20</sup>. Residue K417 is also identified as antigenically significant with K417E facilitating escape from mAb REGN10933<sup>16</sup>.

N501Y +  $\Delta$ H69/V70 sequences were first detected in the UK on 20<sup>th</sup> September 2020, with the cumulative number of N501Y +  $\Delta$ H69/V70 mutated sequences now exceeding the single mutant N501Y lineage (Figure 1F). On closer inspection these sequences were part of a new lineage (B.1.1.7), termed VOC 202012/01 by Public Health England as they are associated

with relatively high numbers of infections (Figure 4A-C, Supplementary Figure 4). In addition to RBD N501Y + NTD  $\Delta$ H69/V70 this new variant had five further S mutations across the RBD (N501Y) and S2 (P681H, T716I, S982A and D1118H), as well as NTD  $\Delta$ 144<sup>21</sup> (Figure 4B). The variant has now been identified in a number of other countries, including Hong Kong, Japan, Australia, France, Spain, Singapore, Israel, Switzerland, and Italy. This lineage has a relatively long branch due to 23 unique mutations (Figure 4A and supplementary figure 4), consistent within host evolution and spread from a chronically infected individual<sup>21</sup>. Notably a related sequence can be identified that contains  $\Delta$ H69/V70, N501Y and D1118H (Figure 4A, black box). However, the available sequences did not enable us to determine whether the B.1.1.7 mutations N501Y +  $\Delta$ H69/V70 arose as a result of a N501Y virus acquiring  $\Delta$ H69/V70 or vice versa.

The B.1.1.7 lineage has some notable features. Firstly the Spike  $\Delta$ 144 mutation could lead to loss of binding of the S1-binding neutralising antibody 4A8<sup>13</sup> (Figure 3B). The Y144 sidechain is itself around 4.5Å from the nearest atoms of 4A8 complexed with Spike and the deletion is expected to alter the positions neighbouring residues that directly interact with 4A8; contacting residues (145, 146, 147, 150, 152, 246 and 258)<sup>22</sup> are shown in magenta in Figure 3B. Secondly the P681H mutation lies within the furin cleavage site. Furin cleavage is a property of some more distantly related coronaviruses, and in particular not found in SARS-CoV-1<sup>23</sup>. When SARS-CoV-2 is passaged *in vitro* it results in mutations in the furin cleavage site, suggesting the cleavage is dispensable for *in vitro* infection<sup>24</sup>. The significance of furin site mutations may be related to potential escape from the innate immune antiviral IFITM proteins by allowing infection independent endosomes<sup>25</sup>. The significance of the multiple S2 mutations is unclear at present, though D614G, also in S2 was found to lead to a more open RBD orientation to explain its higher infectivity<sup>26</sup>. T716I and D1118H occur at residues located close to the base of the ectodomain (Figure 4B) that are partially exposed and buried, respectively. The residue 982 is located centrally, in between the NTDs, at the top of a short helix (approximately residues 976-982) that is completely shielded by the RBD when spike is in the closed form, though becomes slightly more exposed in the open conformation. Residue 681 is part of the loop (residues 676-689) containing the furin-cleavage site, the structure of which is disordered in both cleaved and uncleaved forms<sup>27</sup>, though the surface-exposed locations of modelled residues 676 and 689 (orange in Figure

4B) indicate that the unmodelled residues 677-688 form a prominently-exposed loop; the significant structural flexibility of which has prevented inclusion in structural models<sup>22,28</sup>.

Given the association between  $\Delta$ H69/V70 and RBD gene mutations, we hypothesised similar to our chronic infection<sup>12</sup>, that this deletion might enhancing virus infectivity and compensate for potential loss of infectivity due to RBD mutation. In the absence of virus isolates we used a lentiviral pseudotyping approach to test the impact of  $\Delta$ H69/V70 on virus Spike protein mediated infection. A D614G bearing Spike protein expressing DNA plasmid was co-transfected in HEK 293T producer cell lines along with plasmids encoding lentiviral capsid and genome for luciferase. Mutant Spike plasmids bearing  $\Delta$ H69/V70, N501Y and N501Y+ $\Delta$ H69/V70 were constructed by site directed mutagenesis. Plasmids were expressed in 293T virus producer cells and infectious titres measured in supernatants from cells by infection of target cells expressing ACE2 and TMPRSS2 receptors. The infectious titres were adjusted for virus input as determined by reverse transcriptase activity in virions (Figure 5). As we previously showed,  $\Delta$ H69/V70 Spike pseudotyped virus had higher infectivity compared to wild type (Figure 5)<sup>12</sup>. N501Y showed a significantly lower infectivity compared to wild type and the addition of  $\Delta$ H69/V70 restored infectivity back to wild type levels (Figure 5), consistent with our hypothesis.

## Discussion

We have presented data demonstrating multiple, independent, and circulating lineages of SARS-CoV-2 variants bearing a Spike  $\Delta$ H69/V70. This deletion spanning six nucleotides, is mostly due to an out of frame deletion of six nucleotides, has frequently followed receptor binding amino acid replacements (N501Y, N439K and Y453F that have been shown to increase binding affinity to hACE2 and reduce binding with monoclonal antibodies) and its prevalence is rising internationally. Interestingly the presence of sequence at site 69/70 appears to be unique to SARS-CoV-2 and the closest bat sarbecovirus, RaTG13, and one of the pangolin sequences. We speculate it may have been lost in the other pangolins as these viruses are presumably originated in bats infecting the pangolins after importation to China.



The  $\Delta$ H69/V70 deletion was also shown to increase Spike mediated infectivity by two-fold over a single round of infection, and appeared to occur with a mutation that conferred reduced susceptibility to neutralising antibodies<sup>29</sup>. Over the millions of replication rounds per day in a SARS-CoV-2 infection even modest reductions in antibody susceptibility could be significant. Therefore,  $\Delta$ H69/V70 may be a ‘permissive’ mutation that enhances infection<sup>28</sup>, with the potential to enhance the ability of SARS-CoV-2 to tolerate mutations, which could include immune/ vaccine escape variants that would have otherwise significantly reduced viral fitness. We show here experimentally that the  $\Delta$ H69/V70 deletion is indeed able to rescue an infectivity defect induced by N501Y.

Interestingly, one of the three changes, K417N, in the South African lineage, B.1.351<sup>18</sup>, decreases binding affinity to hACE<sup>20</sup> so moderating the strength of binding, which would have been increased by the N501Y mutation, i.e., a similar outcome for Spike infectivity but through a direct mechanism. This may explain the lack of  $\Delta$ H69/V70 in the South African B.1.35 lineage, though it will be important to know whether this lineage also acquires the  $\Delta$ H69/V70 deletion in the future.

The potential for SARS-CoV-2 to evolve and fix mutations is exemplified by D614G, an amino acid replacement in S2 that alters linkages between S1 and S2 subunits on adjacent protomers as well as RBD orientation, infectivity, and transmission<sup>26,30,31</sup>. The example of D614G also demonstrates that mechanisms directly impacting important biological processes can be indirect. Similarly, a number of possible mechanistic explanations may underlie  $\Delta$ H69/V70. For example, the fact that it sits on an exposed surface and is estimated to alter the conformation of a particularly exposed loop might be suggestive of immune interactions and escape, although allosteric interactions could alternatively lead to the higher infectivity recently reported<sup>31</sup>.

The finding of a lineage (B.1.1.7), termed VOC 202012/01, bearing seven S gene mutations across the RBD (N501Y, A570D), S1 ( $\Delta$ H69/V70 and  $\Delta$ 144) and S2 (P681H, T716I, S982A and D1118H) in UK requires urgent experimental characterisation. The detection of a high number of novel mutations suggests this lineage has either been introduced from a geographic region with very poor sampling or viral evolution may have occurred in a single

individual in the context of a chronic infection<sup>12</sup>. We detected a sequence basal to B1.1.7 that had both mutations as well as D1118H in S2.

This variant bears some concerning features: firstly, the  $\Delta$ H69/V70 deletion which increases infectivity in vitro by two fold<sup>12</sup>. Secondly the  $\Delta$ 144 which may affect binding by antibodies related to 4A8<sup>13</sup>. Thirdly VOC 202012/01 bears the N501Y mutation that may have higher binding affinity for ACE2, and which has arisen independently in other countries, including South Africa where it has led to establishment and explosive transmission of the lineage B.1.351<sup>18</sup>. Finally, the VOC 2020/1201 lineage has a second RBD mutation A570D that could alter Spike RBD structure and a mutation near to the furin cleavage site could represent further adaptative change. The emergence of variants with higher numbers of mutations so far in the UK and South Africa may herald an era of re-infection and threaten future vaccine efficacy if left unchecked.

Given the emergence of multiple clusters of variants carrying RBD mutations and the  $\Delta$ H69/V70 deletion, limitation of transmission takes on a renewed urgency. Continued emphasis on testing/tracing, social distancing and mask wearing are essential, with investment in other novel methods to limit transmission<sup>32</sup>. In concert, comprehensive vaccination efforts in the UK and globally should be accelerated in order to further limit transmission and acquisition of further mutations. If geographically limited then focussed vaccination may be warranted. Research is vitally needed into whether lateral flow devices for antigen and antibody detection can detect emerging strains and the immune responses to them. Finally, detection of the deletion and other key mutations by rapid diagnostics should be a research priority as such tests could be used as a proxy for antibody escape mutations to inform surveillance at global scale.

## Acknowledgements

COG-UK is supported by funding from the Medical Research Council (MRC) part of UK Research & Innovation (UKRI), the National Institute of Health Research (NIHR) and Genome Research Limited, operating as the Wellcome Sanger Institute. RKG is supported by a Wellcome Trust Senior Fellowship in Clinical Science (WT108082AIA). SAK is supported by the Bill and Melinda Gates Foundation via PANGEA grant: OPP1175094. DLR is funded by the

MRC (MC\_UU\_1201412). WH is funded by the MRC (MR/R024758/1). We thank Dr James Voss for the kind gift of HeLa cells stably expressing ACE2. SL is funded by Medical Research Council MC\_UU\_12014/12. This study was also partly funded by Rosetrees Trust.

## Conflicts of interest

RKG has received consulting fees from UMOVIS lab, Gilead Sciences and ViiV Healthcare, and a research grant from InvisiSmart Technologies.

## Methods

### *Phylogenetic Analysis*

All available full-genome SARS-CoV-2 sequences were downloaded from the GISAID database (<http://gisaid.org/>)<sup>33</sup> on 26<sup>th</sup> November. Duplicate and low-quality sequences (>5% N regions) were removed, leaving a dataset of 194,265 sequences with a length of >29,000bp. All sequences were realigned to the SARS-CoV-2 reference strain MN908947.3, using MAFFT v7.475 with automatic flavour selection and the --keeplength --addfragments options<sup>34</sup>. Major SARS-CoV-2 clade memberships were assigned to all sequences using the Nextclade server v0.10 (<https://clades.nextstrain.org/>).

Maximum likelihood phylogenetic trees were produced using the above curated dataset using IQ-TREE v2.1.2<sup>35</sup>. Evolutionary model selection for trees were inferred using ModelFinder<sup>36</sup> and trees were estimated using the GTR+F+I model with 1000 ultrafast bootstrap replicates<sup>37</sup>. All trees were visualised with Figtree v.1.4.4 (<http://tree.bio.ed.ac.uk/software/figtree/>) and ggtree v1.14.6 rooted on the SARS-CoV-2 reference sequence and nodes arranged in descending order. Nodes with bootstraps values of <50 were collapsed using an in-house script.

To reconstruct a phylogeny for the 69/70 Spike region of the 17 *Sarbecoviruses* examined in Fig 2, Rdp5<sup>38</sup> was used on the codon Spike alignment to determine the region between amino acids 1 and 256 as putatively non-recombinant. A tree was reconstructed using the protein alignment of this region with FastTree (default parameters)<sup>39</sup>. Alignment visualisation was done using BioEdit<sup>40</sup>.

## Structural modelling

The structure of the post-deletion NTD (residues 14-306) was modelled using I-TASSER<sup>41</sup>, a method involving detection of templates from the protein data bank, fragment structure assembly using replica-exchange Monte Carlo simulation and atomic-level refinement of structure using a fragment-guided molecular dynamics simulation. The structural model generated was aligned with the spike structure possessing the pre-deletion conformation of the 69-77 loop (PDB 7C2L<sup>22</sup>) using PyMOL (Schrödinger). Figures prepared with PyMOL using PDBs 7C2L, 6MOJ<sup>42</sup>, 6ZGE28 and 6ZGG<sup>28</sup>.

## Pseudotype virus preparation

Viral vectors were prepared by transfection of 293T cells by using Fugene HD transfection reagent (Promega). 293T cells were transfected with a mixture of 11ul of Fugene HD, 1µg of pCDNAΔ19Spike-HA, 1ug of p8.91 HIV-1 gag-pol expression vector<sup>22,23</sup>, and 1.5µg of pCSFLW (expressing the firefly luciferase reporter gene with the HIV-1 packaging signal). Viral supernatant was collected at 48 and 72h after transfection, filtered through 0.45um filter and stored at -80°C as previously described<sup>24</sup>. Infectivity was measured by luciferase detection in target 293T cells transfected with TMPRSS2 and ACE2.

## Standardisation of virus input by SYBR Green-based product-enhanced PCR assay (SG-PERT)

The reverse transcriptase activity of virus preparations was determined by qPCR using a SYBR Green-based product-enhanced PCR assay (SG-PERT) as previously described<sup>43</sup>.

Briefly, 10-fold dilutions of virus supernatant were lysed in a 1:1 ratio in a 2x lysis solution (made up of 40% glycerol v/v 0.25% Triton X-100 v/v 100mM KCl, RNase inhibitor 0.8 U/ml, TrisHCL 100mM, buffered to pH7.4) for 10 minutes at room temperature.

12µl of each sample lysate was added to thirteen 13µl of a SYBR Green master mix (containing 0.5µM of MS2-RNA Fwd and Rev primers, 3.5pmol/ml of MS2-RNA, and 0.125U/µl of Ribolock RNase inhibitor and cycled in a QuantStudio. Relative amounts of reverse transcriptase activity were determined as the rate of transcription of bacteriophage MS2 RNA, with absolute RT activity calculated by comparing the relative amounts of RT to an RT standard of known activity.

384

## 385 References

- 386 1 Zhou, P. *et al.* A pneumonia outbreak associated with a new coronavirus of probable  
387 bat origin. *nature* **579**, 270-273 (2020).
- 388 2 Sungnak, W. *et al.* SARS-CoV-2 entry factors are highly expressed in nasal epithelial  
389 cells together with innate immune genes. *Nat Med* **26**, 681-687,  
390 doi:10.1038/s41591-020-0868-6 (2020).
- 391 3 Thomson, E. C. *et al.* The circulating SARS-CoV-2 spike variant N439K maintains  
392 fitness while evading antibody-mediated immunity. *bioRxiv* (2020).
- 393 4 Starr, T. N. *et al.* Deep mutational scanning of SARS-CoV-2 receptor binding domain  
394 reveals constraints on folding and ACE2 binding. *Cell* **182**, 1295-1310. e1220 (2020).
- 395 5 Greaney, A. J. *et al.* Complete mapping of mutations to the SARS-CoV-2 spike  
396 receptor-binding domain that escape antibody recognition. *Cell Host & Microbe*  
397 (2020).
- 398 6 Starr, T. N. *et al.* Prospective mapping of viral mutations that escape antibodies used  
399 to treat COVID-19. *bioRxiv* (2020).
- 400 7 Choi, B. *et al.* Persistence and Evolution of SARS-CoV-2 in an Immunocompromised  
401 Host. *The New England journal of medicine* **383**, 2291-2293,  
402 doi:10.1056/NEJMc2031364 (2020).
- 403 8 MacLean, O. A. *et al.* Natural selection in the evolution of SARS-CoV-2 in bats, not  
404 humans, created a highly capable human pathogen. *BioRxiv* (2020).
- 405 9 consortiumcontact@cogconsortium.uk, C.-G. U. An integrated national scale SARS-  
406 CoV-2 genomic surveillance network. *Lancet Microbe* **1**, e99-e100,  
407 doi:10.1016/S2666-5247(20)30054-9 (2020).
- 408 10 Mlcochova, P. *et al.* Combined Point-of-Care Nucleic Acid and Antibody Testing for  
409 SARS-CoV-2 following Emergence of D614G Spike Variant. *Cell Rep Med* **1**, 100099,  
410 doi:10.1016/j.xcrm.2020.100099 (2020).
- 411 11 He, X. *et al.* Temporal dynamics in viral shedding and transmissibility of COVID-19.  
412 *Nat Med* **26**, 672-675, doi:10.1038/s41591-020-0869-5 (2020).
- 413 12 Kemp, S. A. *et al.* Neutralising antibodies drive Spike mediated SARS-CoV-2 evasion.  
414 *medRxiv*, 2020.2012.2005.20241927, doi:10.1101/2020.12.05.20241927 (2020).

- 415 13 McCarthy, K. R. *et al.* Natural deletions in the SARS-CoV-2 spike glycoprotein drive  
416 antibody escape. *bioRxiv*, 2020.2011.2019.389916, doi:10.1101/2020.11.19.389916  
417 (2020).
- 418 14 Lam, T. T. *et al.* Identifying SARS-CoV-2-related coronaviruses in Malayan pangolins.  
419 *Nature* **583**, 282-285, doi:10.1038/s41586-020-2169-0 (2020).
- 420 15 Munnink, B. B. O. *et al.* Transmission of SARS-CoV-2 on mink farms between humans  
421 and mink and back to humans. *Science* (2020).
- 422 16 Baum, A. *et al.* Antibody cocktail to SARS-CoV-2 spike protein prevents rapid  
423 mutational escape seen with individual antibodies. *Science* **369**, 1014-1018,  
424 doi:10.1126/science.abd0831 (2020).
- 425 17 Gu, H. *et al.* Adaptation of SARS-CoV-2 in BALB/c mice for testing vaccine efficacy.  
426 *Science* **369**, 1603-1607, doi:10.1126/science.abc4730 (2020).
- 427 18 Tegally, H. *et al.* Emergence and rapid spread of a new severe acute respiratory  
428 syndrome-related coronavirus 2 (SARS-CoV-2) lineage with multiple spike mutations  
429 in South Africa. *medRxiv*, 2020.2012.2021.20248640,  
430 doi:10.1101/2020.12.21.20248640 (2020).
- 431 19 Weisblum, Y. *et al.* Escape from neutralizing antibodies by SARS-CoV-2 spike protein  
432 variants. *Elife* **9**, e61312, doi:10.7554/eLife.61312 (2020).
- 433 20 Starr, T. N. *et al.* Deep Mutational Scanning of SARS-CoV-2 Receptor Binding Domain  
434 Reveals Constraints on Folding and ACE2 Binding. *Cell* **182**, 1295-1310 e1220,  
435 doi:10.1016/j.cell.2020.08.012 (2020).
- 436 21 Rambaut A., L. N., Pybus O, Barclay W, Carabelli A. C., Connor T., Peacock T.,  
437 Robertson D. L., Volz E., on behalf of COVID-19 Genomics Consortium UK (CoG-UK).  
438 *Preliminary genomic characterisation of an emergent SARS-CoV-2 lineage in the UK*  
439 *defined by a novel set of spike mutations*, <[https://virological.org/t/preliminary-](https://virological.org/t/preliminary-genomic-characterisation-of-an-emergent-sars-cov-2-lineage-in-the-uk-defined-by-a-novel-set-of-spike-mutations/563)  
440 [genomic-characterisation-of-an-emergent-sars-cov-2-lineage-in-the-uk-defined-by-a-](https://virological.org/t/preliminary-genomic-characterisation-of-an-emergent-sars-cov-2-lineage-in-the-uk-defined-by-a-novel-set-of-spike-mutations/563)  
441 [novel-set-of-spike-mutations/563](https://virological.org/t/preliminary-genomic-characterisation-of-an-emergent-sars-cov-2-lineage-in-the-uk-defined-by-a-novel-set-of-spike-mutations/563)> (2020).
- 442 22 Chi, X. *et al.* A neutralizing human antibody binds to the N-terminal domain of the  
443 Spike protein of SARS-CoV-2. *Science* **369**, 650-655, doi:10.1126/science.abc6952  
444 (2020).
- 445 23 Andersen, K. G., Rambaut, A., Lipkin, W. I., Holmes, E. C. & Garry, R. F. The proximal  
446 origin of SARS-CoV-2. *Nat Med* **26**, 450-452, doi:10.1038/s41591-020-0820-9 (2020).

- 447 24 Davidson, A. D. *et al.* Characterisation of the transcriptome and proteome of SARS-  
448 CoV-2 reveals a cell passage induced in-frame deletion of the furin-like cleavage site  
449 from the spike glycoprotein. *Genome Med* **12**, 68, doi:10.1186/s13073-020-00763-0  
450 (2020).
- 451 25 Peacock, T. P. *et al.* The furin cleavage site of SARS-CoV-2 spike protein is a key  
452 determinant for transmission due to enhanced replication in airway cells. *bioRxiv*  
453 (2020).
- 454 26 Yurkovetskiy, L. *et al.* Structural and Functional Analysis of the D614G SARS-CoV-2  
455 Spike Protein Variant. *Cell* **183**, 739-751 e738, doi:10.1016/j.cell.2020.09.032 (2020).
- 456 27 Wrobel, A. G. *et al.* SARS-CoV-2 and bat RaTG13 spike glycoprotein structures inform  
457 on virus evolution and furin-cleavage effects. *Nature Structural & Molecular Biology*  
458 **27**, 763-767, doi:10.1038/s41594-020-0468-7 (2020).
- 459 28 Wrobel, A. G. *et al.* SARS-CoV-2 and bat RaTG13 spike glycoprotein structures inform  
460 on virus evolution and furin-cleavage effects. *Nat Struct Mol Biol* **27**, 763-767,  
461 doi:10.1038/s41594-020-0468-7 (2020).
- 462 29 Kemp, S. A. *et al.* Recurrent emergence and transmission of a SARS-CoV-2 Spike  
463 deletion  $\Delta$ H69/V70. *bioRxiv*, 2020.2012.2014.422555,  
464 doi:10.1101/2020.12.14.422555 (2020).
- 465 30 Korber, B. *et al.* Tracking changes in SARS-CoV-2 Spike: evidence that D614G  
466 increases infectivity of the COVID-19 virus. *Cell* **182**, 812-827. e819 (2020).
- 467 31 Hou, Y. J. *et al.* SARS-CoV-2 D614G variant exhibits efficient replication ex vivo and  
468 transmission in vivo. *Science* **370**, 1464-1468, doi:10.1126/science.abe8499 (2020).
- 469 32 Mlcochova, P. *et al.* Extended in vitro inactivation of SARS-CoV-2 by titanium dioxide  
470 surface coating. *bioRxiv* (2020).
- 471 33 Shu, Y. & McCauley, J. GISAID: Global initiative on sharing all influenza data - from  
472 vision to reality. *Euro surveillance : bulletin Europeen sur les maladies transmissibles*  
473 = *European communicable disease bulletin* **22**, 30494, doi:10.2807/1560-  
474 7917.ES.2017.22.13.30494 (2017).
- 475 34 Katoh, K. & Standley, D. M. MAFFT multiple sequence alignment software version 7:  
476 improvements in performance and usability. *Mol Biol Evol* **30**, 772-780,  
477 doi:10.1093/molbev/mst010 (2013).

478 35 Minh, B. Q. *et al.* IQ-TREE 2: New Models and Efficient Methods for Phylogenetic  
479 Inference in the Genomic Era. *Mol Biol Evol* **37**, 1530-1534,  
480 doi:10.1093/molbev/msaa015 (2020).

481 36 Kalyaanamoorthy, S., Minh, B. Q., Wong, T. K. F., von Haeseler, A. & Jermini, L. S.  
482 ModelFinder: fast model selection for accurate phylogenetic estimates. *Nat Methods*  
483 **14**, 587-589, doi:10.1038/nmeth.4285 (2017).

484 37 Minh, B. Q., Nguyen, M. A. & von Haeseler, A. Ultrafast approximation for  
485 phylogenetic bootstrap. *Mol Biol Evol* **30**, 1188-1195, doi:10.1093/molbev/mst024  
486 (2013).

487 38 Martin, D. P., Murrell, B., Golden, M., Khoosal, A. & Muhire, B. RDP4: Detection and  
488 analysis of recombination patterns in virus genomes. *Virus evolution* **1** (2015).

489 39 Price, M. N., Dehal, P. S. & Arkin, A. P. FastTree: computing large minimum evolution  
490 trees with profiles instead of a distance matrix. *Mol Biol Evol* **26**, 1641-1650,  
491 doi:10.1093/molbev/msp077 (2009).

492 40 Hall, T., Biosciences, I. & Carlsbad, C. BioEdit: an important software for molecular  
493 biology. *GERF Bull Biosci* **2**, 60-61 (2011).

494 41 Roy, A., Kucukural, A. & Zhang, Y. I-TASSER: a unified platform for automated protein  
495 structure and function prediction. *Nat Protoc* **5**, 725-738, doi:10.1038/nprot.2010.5  
496 (2010).

497 42 Lan, J. *et al.* Structure of the SARS-CoV-2 spike receptor-binding domain bound to  
498 the ACE2 receptor. *Nature* **581**, 215-220, doi:10.1038/s41586-020-2180-5 (2020).

499 43 Vermeire, J. *et al.* Quantification of reverse transcriptase activity by real-time PCR as  
500 a fast and accurate method for titration of HIV, lenti- and retroviral vectors. *PLoS one*  
501 **7**, e50859-e50859, doi:10.1371/journal.pone.0050859 (2012).

502



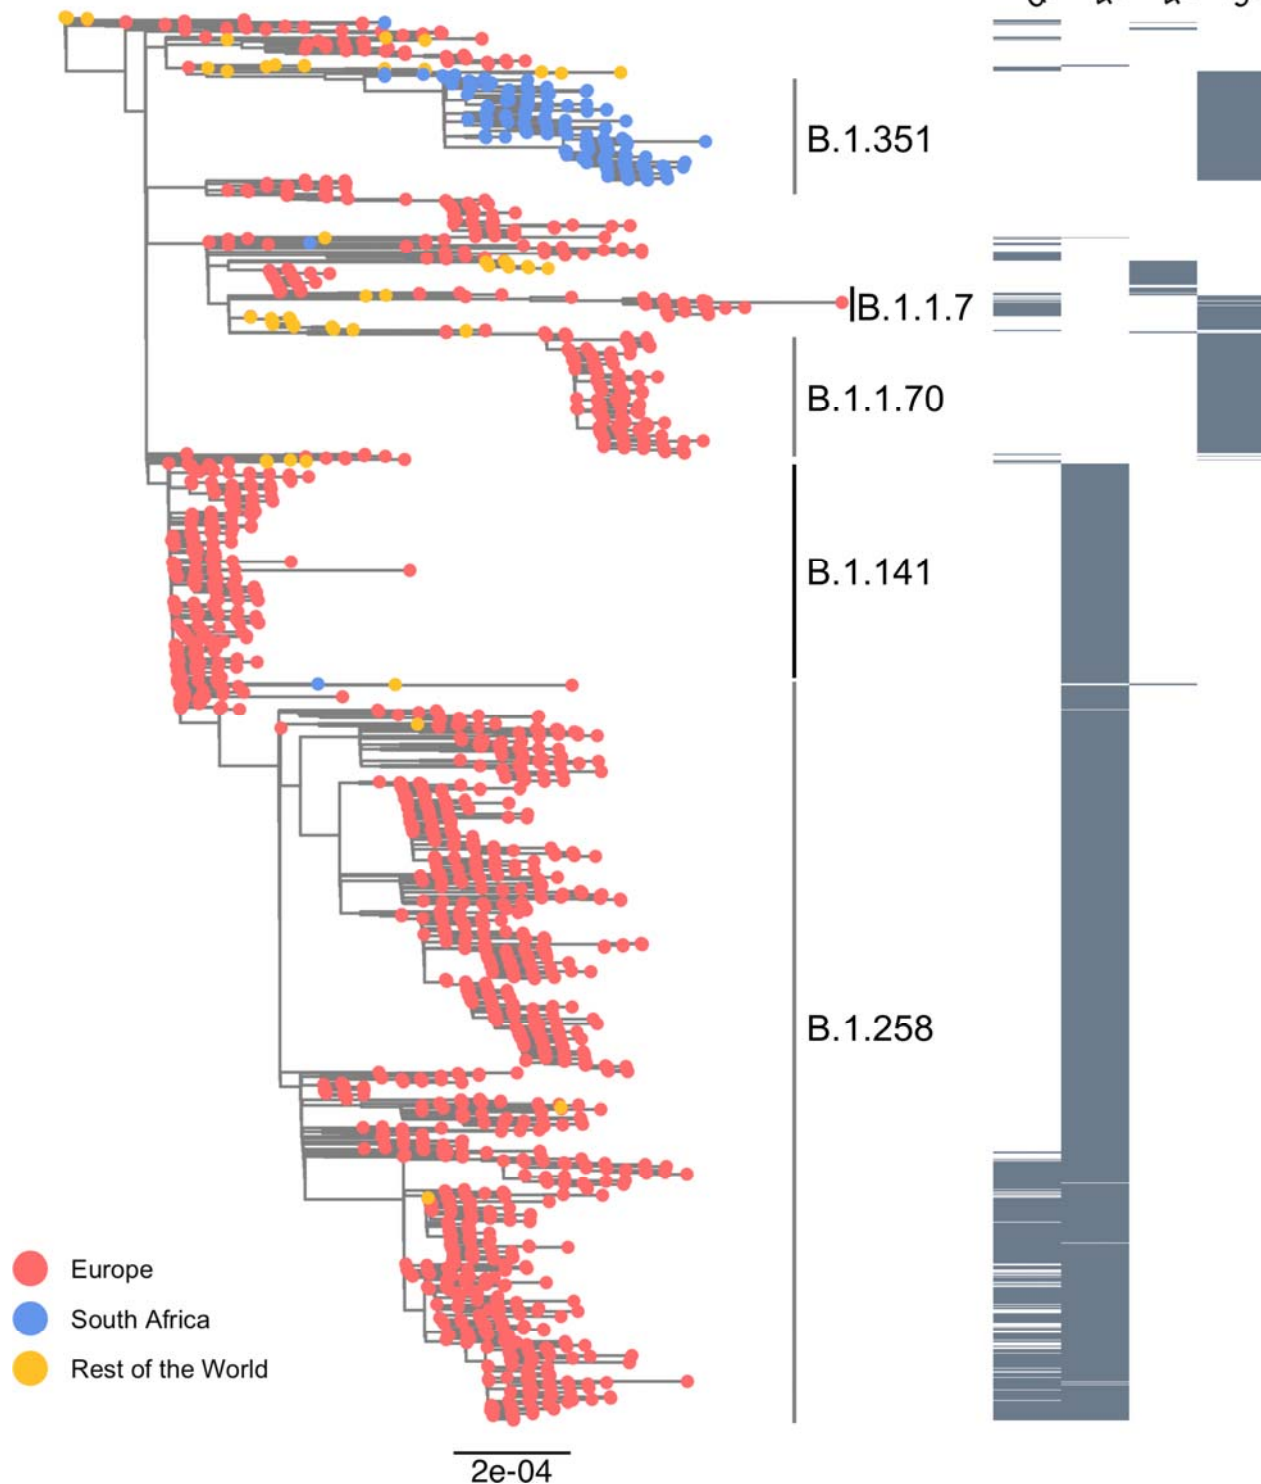

**Figure 1. A. Sub-sampled global phylogeny of SARS-CoV-2 whole genome sequences highlighting those with specific mutations in Spike:  $\Delta$ H69/V70, N439K, Y453F and N501Y.** Tree tips are coloured by geographic region (see key). Grey bars on the right show the presence or absence of the deletion H69/V70 and amino acid variants N439K, Y453F, and N501Y. Lineages from Rambaut et al. 2020 are shown.

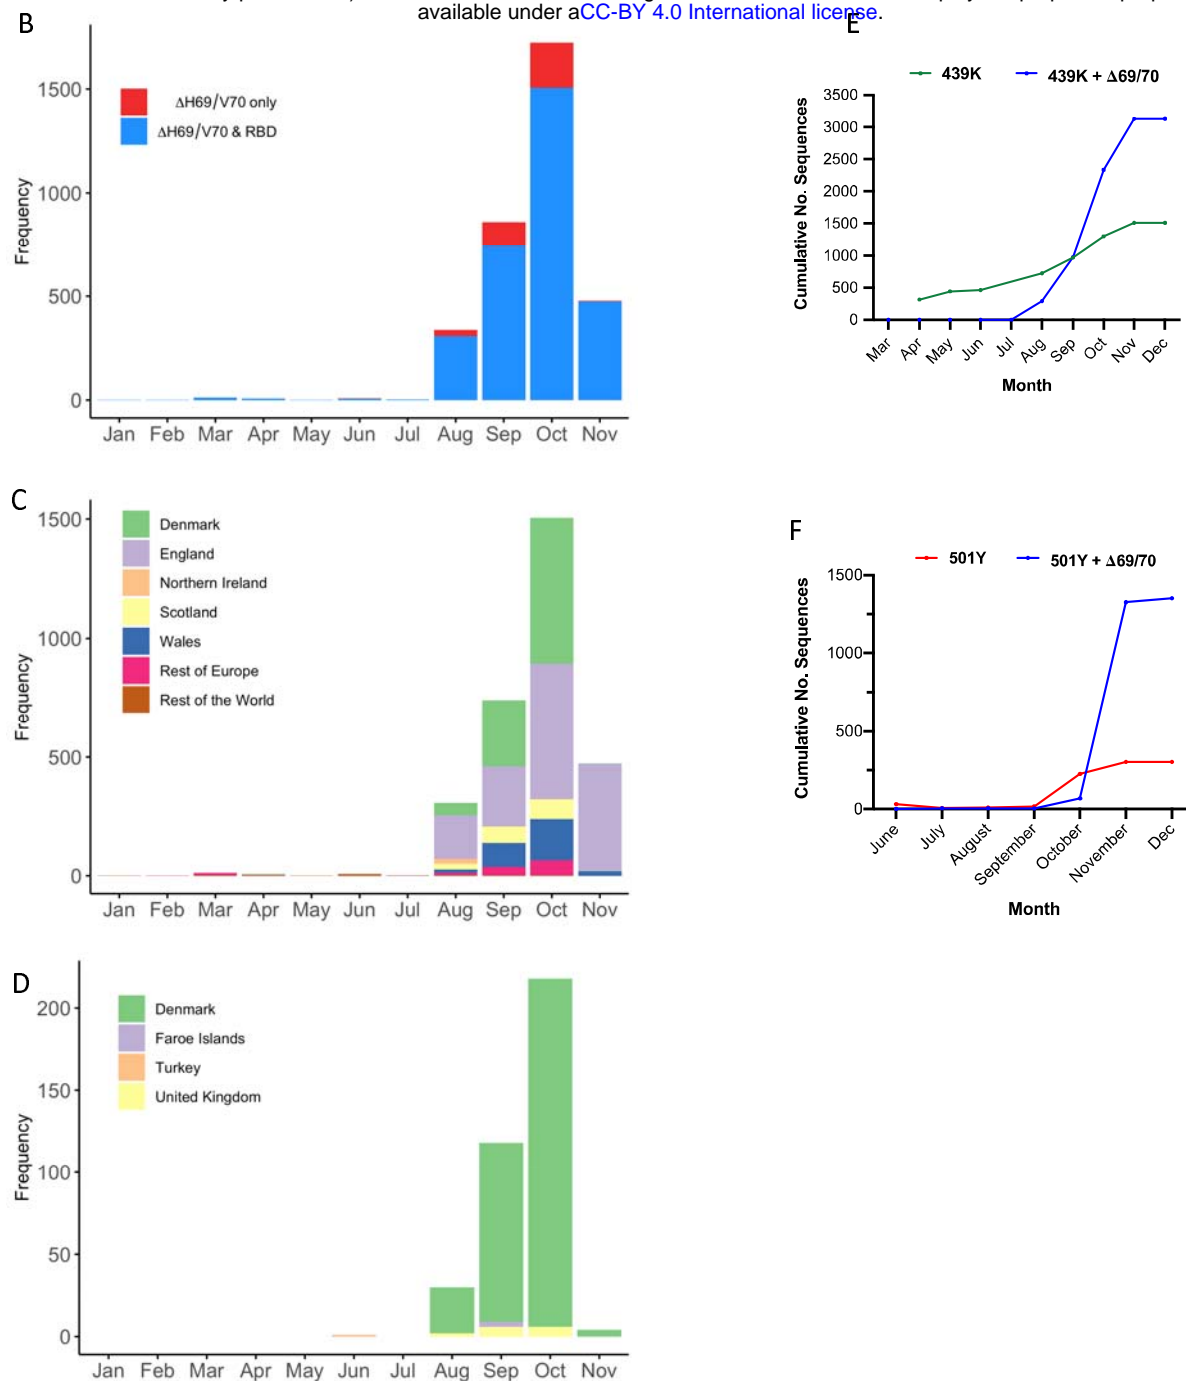

**Figure 1B–D. Number of new occurrences of SARS-CoV-2 sequences with the  $\Delta$  H69/V70 deletion.** Frequency of the  $\Delta$ H69/V70 deletion from the GISAID database (accessed 16<sup>th</sup> Dec 2020) by reporting country and sampling date: **B.** Worldwide carriage of  $\Delta$ H69/V70; most sequences preferentially carry RBD mutations alongside the deletion. **C.** Several distinct  $\Delta$ H69/V70 lineages carrying RBD mutations 439K, 453F and 501Y have begun to emerge, predominantly in Denmark and England. **D.** Sequences carrying the  $\Delta$ H69/V70 but in the absence of other major Spike mutations are restricted mostly to Denmark. **The relative increase in frequency of sequences carrying Spike mutants 439K E. 501Y F. and  $\Delta$ H69/70; viruses co-carrying the  $\Delta$ 69/70 deletion became dominant between September-October 2020 in terms of cumulative cases.**

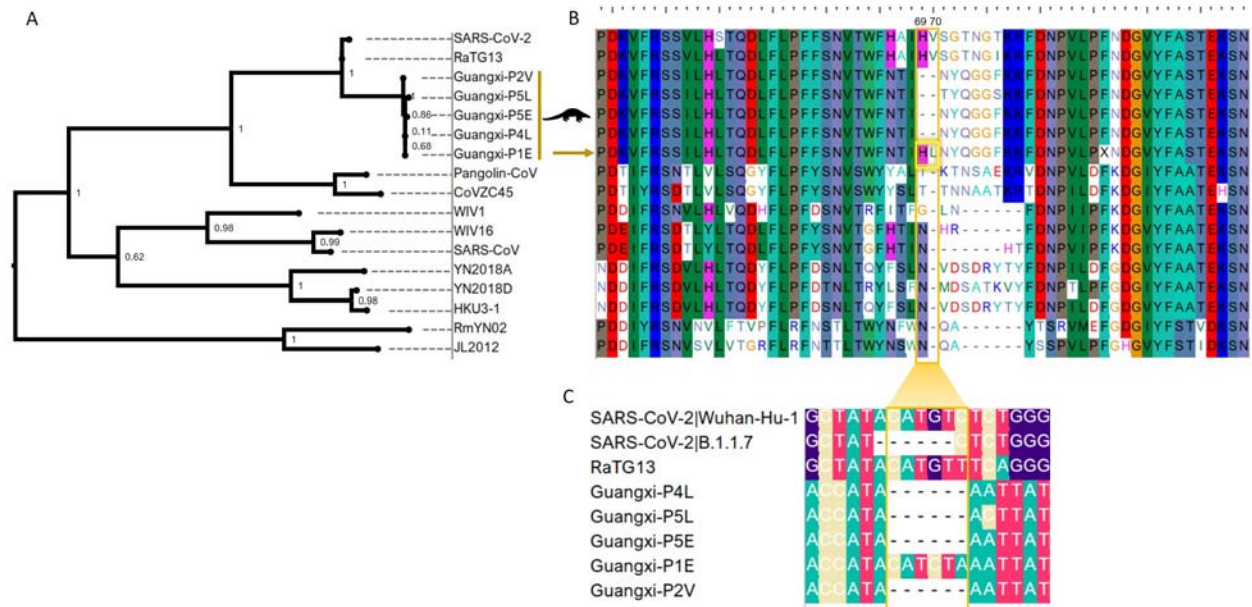

**Figure 2. Comparison of the H69/V70 deletion site to other sarbecoviruses. A.** phylogeny for the Spike region 1-256 for **B.** protein sequences from 17 Sarbecoviruses, including SARS-CoV-2 (Wuhan-Hu-1) and SARS-CoV (HSZ-Cc), with distinct genotypes at the Spike region around amino acid positions 69 and 70 (highlighted in orange box). The 69/70 HL insertion in the P1E sequence from the Guangxi pangolin virus cluster is highlighted in a yellow box. **C.** The nucleotide alignment between SARS-CoV-2 Wuhan-Hu-1, B.1.1.7, the bat sarbecovirus (RatG13) and the Guangxi pangolin viruses shows the difference between the out of frame deletion observed in the former and the in-frame deletion in the latter.

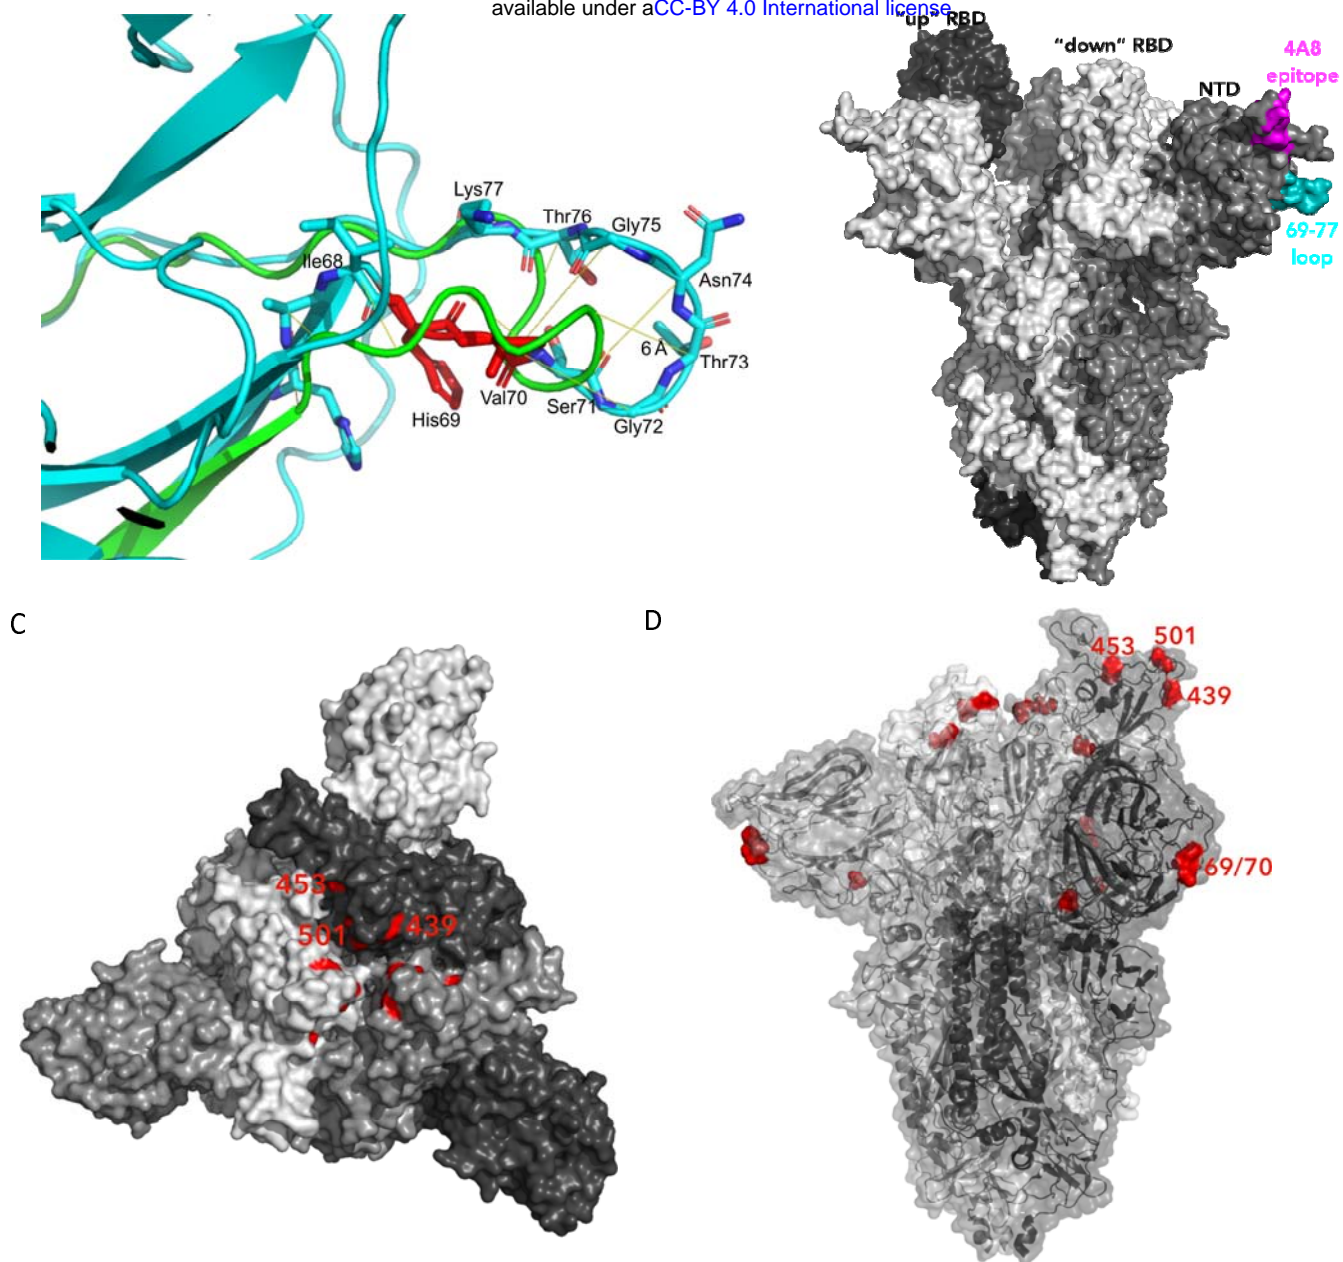

**Figure 3. Structural characteristics of viruses carrying deletion at H69/V70 and co-occurring RBD mutations** **A.** Prediction of conformational change in the spike N-terminal domain due to deletion of residues His69 and Val70. The pre-deletion structure is shown in cyan, except for residues 69 and 70, which are shown in red. The predicted post-deletion structure is shown in green. Residues 66-77 of the pre-deletion structure are shown in stick representation and coloured by atom (nitrogen in blue, oxygen in coral). Yellow lines connect aligned residues 66-77 of the pre- and post-deletion structures and the distance of 6 Å between aligned alpha carbons of Thr73 in the pre- and post-deletion conformation is labelled. **B.** Surface representation of spike homotrimer in open conformation (PDB: 7C2L) with each monomer shown in different shades of grey. On the monomer shown positioned to the right, the exposed loop consisting of residues 69-77 is shown in cyan and the neutralising antibody (4A8) binding NTD epitope described by Chi et al. is shown in magenta. **C.** Surface representation of spike in closed conformation (PDB: 6ZGE) viewed in a 'top-down' view along the trimer axis. The residues associated with RBD substitutions N439K, Y453F and N501Y are highlighted in red and labelled on a single monomer. **D.** Spike in open conformation with a single erect RBD (PDB: 6ZGG) in trimer axis vertical view with the location of Δ H69/V70 in the N-terminal domain and RBD mutations highlighted as red spheres and



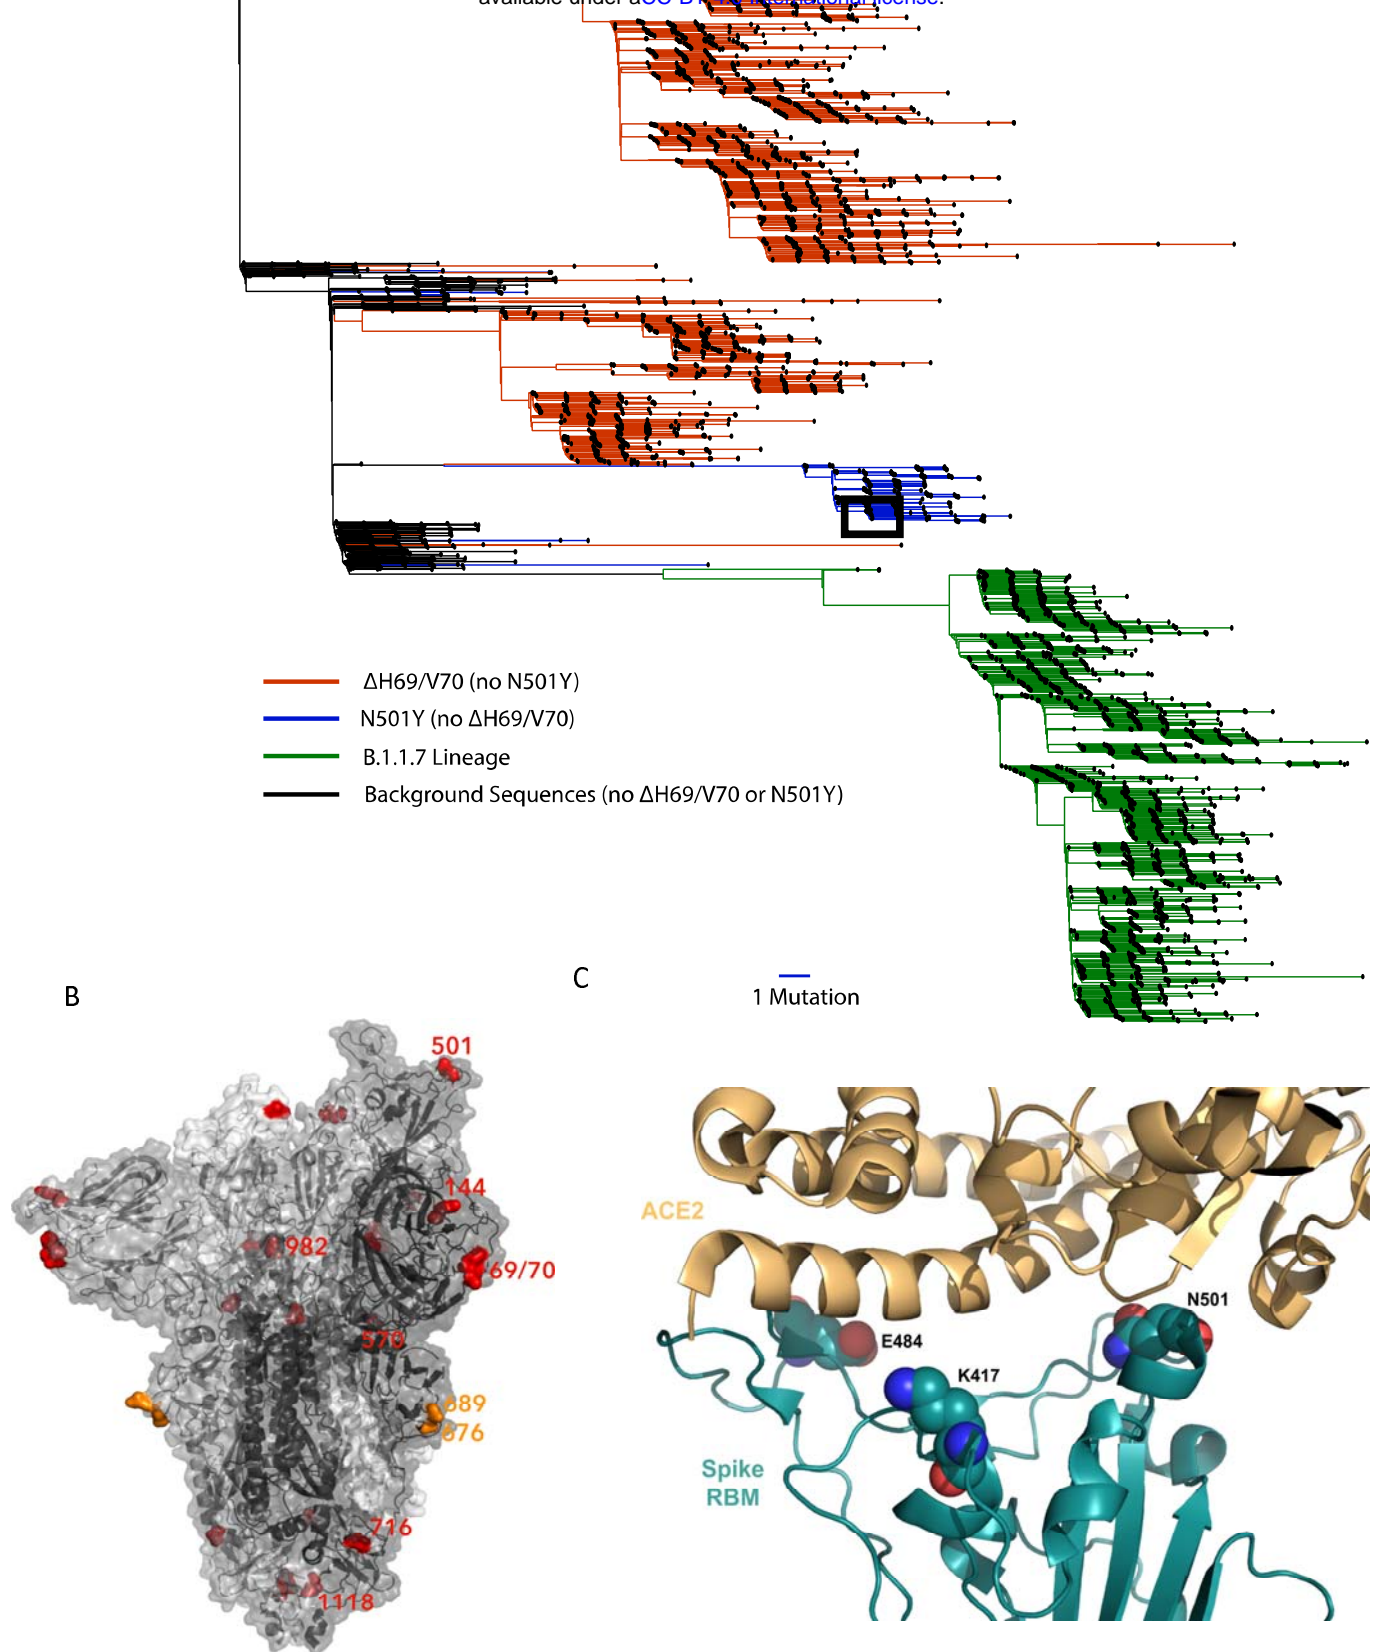

**Figure 4. A. Lineages bearing Spike N501Y and  $\Delta$ H69/V70 mutations:** A sub-sampled global phylogeny of SARS-CoV-2 sequences bearing either the  $\Delta$ H69/V70 or N501Y mutations. Duplicate sequences were removed, and 200 randomly sub-sampled background sequences (without either mutation) were included to create a representative sub-sample of sequences. Distinct sub-lineages of the  $\Delta$ H69/V70 mutation are currently circulating, predominantly in the UK. The novel UK variant VOC 202012/01 (Lineage B.1.1.7, green) is also shown and in black box a related sequence carrying N501Y,  $\Delta$ H69/V70 and D1118H. **B.** Surface representation of spike homotrimer in open conformation with one upright RBD overlaid with ribbon representation (PDB: 6ZGG, Wrobel et al., 2020), with different monomers shown in shades of grey. The deleted residues H69 and V70 and the residues involved in amino acid substitutions (501, 570, 716, 982 and 1118) and the deletion at position 144 are coloured red on each

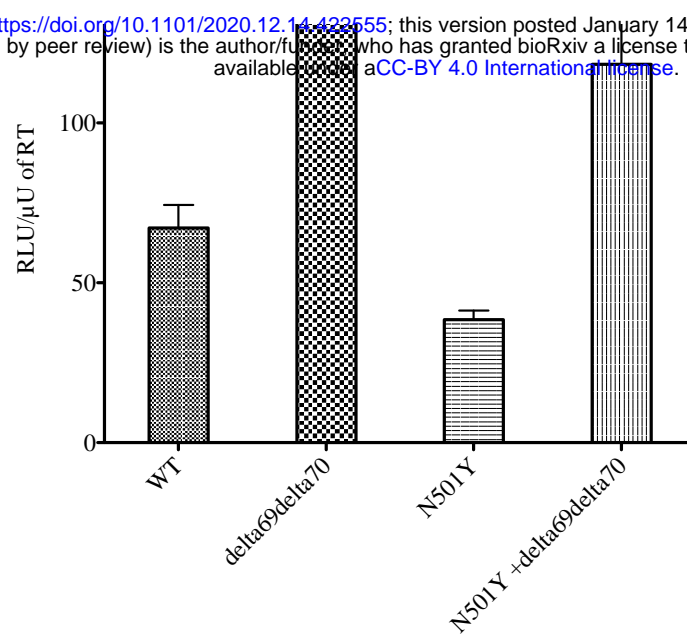

**Figure 5: Spike mutant  $\Delta$ H69/V70 has 2 fold higher infectivity compared to wild type (D614G background) and compensates for infectivity defect of Spike N501Y.** Single round Infection of target cells A and B by luciferase expressing lentivirus pseudotyped with SARS-CoV-2 Spike protein on 293T cells co-transfected with ACE2 and TMPRSS2 plasmids. Data showing Infectivity normalized for virus input using reverse transcriptase activity in virus supernatants. RLU – relative light units; U – unit of reverse transcriptase activity (RT). Data are representative of 2 independent experiments.
